# Supplementary material for: Seroprevalence and silent infection rate during SARS-CoV-2 pandemic among children and adolescents in Western Pomerania: a multicenter, cross-sectional study—the COVIDKID study
Source: PeerJ journal article supplement (doi:10.7717/peerj.18384), 2024-11-11

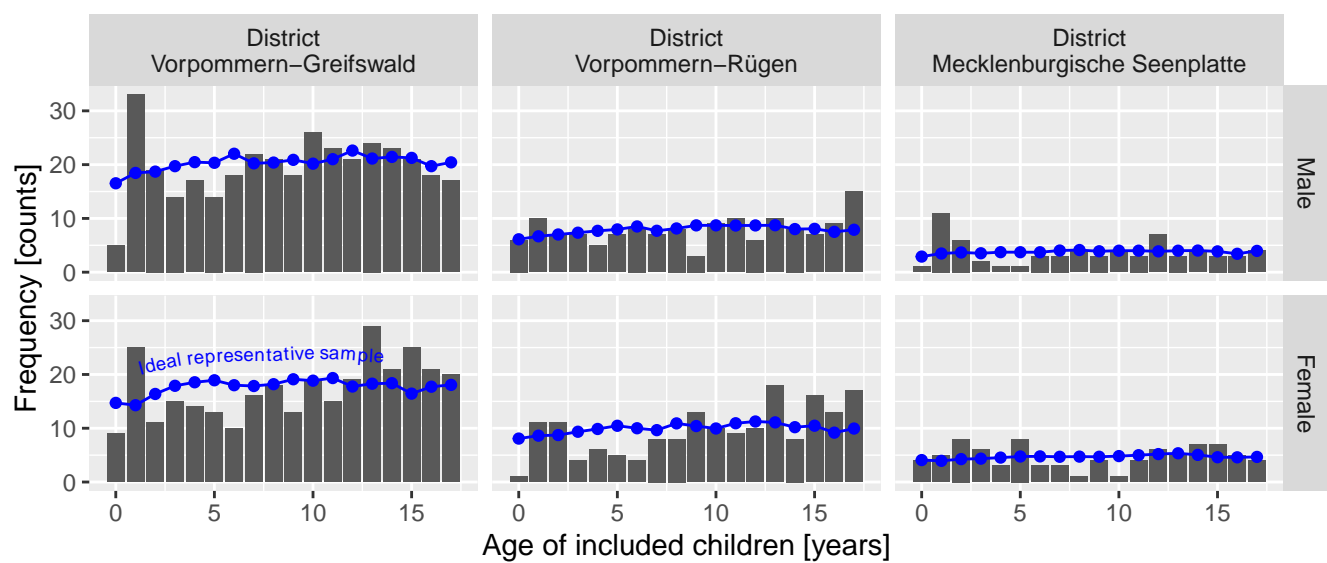

Supplement: Figure_S1.pdf [file Figure_S1.pdf]
