# Supplementary material for: Seroprevalence and silent infection rate during SARS-CoV-2 pandemic among children and adolescents in Western Pomerania: a multicenter, cross-sectional study—the COVIDKID study
Source: PeerJ journal article supplement (doi:10.7717/peerj.18384), 2024-11-11

— Vaccination rate estimated from COVIDKID — Vaccination rate tracked by RKI DIM

School children  
Age 5–11 years (n=393)

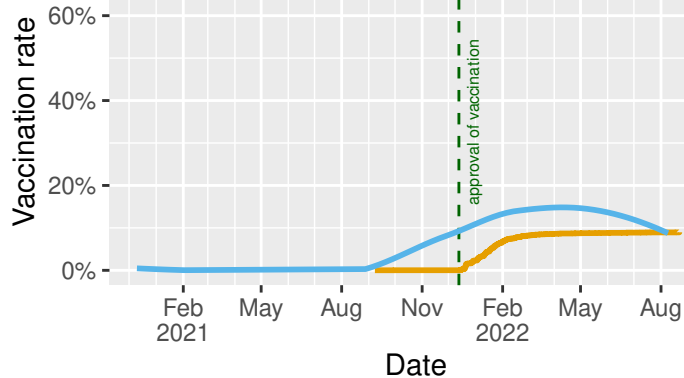

Adolescents  
Age 12–17 years (n=443)

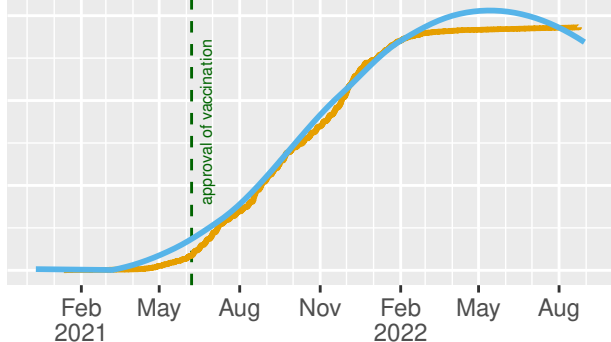

Supplement: Figure_S2.pdf [file Figure_S2.pdf]
